# Supplementary material
Source: MDPI journal article supplement (https://www.mdpi.com/2073-4344/11/5/525)
Supplement: s1 [file s1]

# Supplementary Materials: Chlorodifluoromethane Hydrodechlorination on Carbon-Supported Pd-Pt Catalysts. Beneficial Effect of Catalyst Oxidation

Monika Radlik <sup>1,\*</sup>, Wojciech Juszczyk <sup>2</sup>, Wioletta Raróg-Pilecka <sup>3</sup>, Magdalena Zybert <sup>3</sup> and Zbigniew Karpinski <sup>1,\*</sup>

<sup>1</sup> Faculty of Mathematics and Natural Sciences, Cardinal Stefan Wyszyński University in Warsaw, ul. Wóycickiego 1/3, PL-01938 Warszawa, Poland

<sup>2</sup> Institute of Physical Chemistry, Polish Academy of Sciences, ul. Kasprzaka 44/52, PL-01224 Warszawa, Poland; wjuszczyk@ichf.edu.pl

<sup>3</sup> Faculty of Chemistry, Warsaw University of Technology, ul. Noakowskiego 3, PL-00664 Warszawa, Poland; wiola@ch.pw.edu.pl (W.R.-P.); mzybert@ch.pw.edu.pl (M.Z.)

\* Correspondence: m.radlik@uksw.edu.pl (M.R.); z.karpinski@uksw.edu.pl (Z.K.), Tel.: +48-516138358 (M.R.); +48-604053267 (Z.K.)

**Table S1.** CHClF<sub>2</sub> hydrodechlorination on Pd-Pt/(acac)/Norit1600 catalysts precalcined at 320 °C for 1 h. TOFs, selectivities and apparent energies of activation.

| Catalyst <sup>a,b</sup>             | Reaction temperature<br>°C | TOF <sup>c</sup><br>s <sup>-1</sup> | Product selectivity, % |                   |                  |                                | Activation energy,<br>kJ/mol |
|-------------------------------------|----------------------------|-------------------------------------|------------------------|-------------------|------------------|--------------------------------|------------------------------|
|                                     |                            |                                     | CH <sub>4</sub>        | CH <sub>3</sub> F | CHF <sub>3</sub> | CH <sub>2</sub> F <sub>2</sub> |                              |
| Pd100(acac)<br>H/Pd = 0.123         | 272                        | 1.06 × 10 <sup>-3</sup>             | 26.7                   | -                 | -                | 73.3                           | 97.3 ± 1.9                   |
|                                     | 262                        | 7.15 × 10 <sup>-4</sup>             | 23.2                   | -                 | -                | 76.8                           |                              |
|                                     | 252                        | 4.7 × 10 <sup>-4</sup>              | 20.6                   | -                 | -                | 79.4                           |                              |
| Pd80Pt20(acac)<br>H/(Pd+Pt) = 0.191 | 271                        | 1.41 × 10 <sup>-3</sup>             | 32.8                   | 3.6               | -                | 63.6                           | 97.8 ± 5.2                   |
|                                     | 262                        | 1.02 × 10 <sup>-3</sup>             | 24.7                   | 5.2               | -                | 70.1                           |                              |
|                                     | 251                        | 6.2 × 10 <sup>-4</sup>              | 24.9                   | 6.0               | -                | 69.1                           |                              |
| Pd60Pt40(acac)<br>H/(Pd+Pt) = 0.252 | 271                        | 1.95 × 10 <sup>-3</sup>             | 43.0                   | 9.5               | -                | 47.5                           | 91.1 ± 8.8                   |
|                                     | 262                        | 1.30 × 10 <sup>-3</sup>             | 40.8                   | 9.3               | -                | 48.9                           |                              |
|                                     | 251                        | 9.0 × 10 <sup>-4</sup>              | 36.6                   | 14.8              | -                | 48.6                           |                              |
| Pd40Pt60(acac)<br>H/(Pd+Pt) = 0.331 | 271                        | 1.64 × 10 <sup>-3</sup>             | 44.2                   | 13.5              | -                | 42.3                           | 76.6 ± 4.3                   |
|                                     | 263                        | 1.25 × 10 <sup>-3</sup>             | 40.9                   | 14.6              | -                | 44.5                           |                              |
|                                     | 252                        | 8.7 × 10 <sup>-4</sup>              | 36.5                   | 14.9              | -                | 48.6                           |                              |
| Pt100(acac)<br>H/Pt = 0.465         | 271                        | 6.0 × 10 <sup>-4</sup>              | 58.4                   | 14.9              | 14.0             | 12.7                           | 103.6 ± 2.7                  |
|                                     | 262                        | 4.0 × 10 <sup>-4</sup>              | 60.2                   | 20.7              | 4.0              | 19.1                           |                              |
|                                     | 251                        | 2.5 × 10 <sup>-4</sup>              | 74.0                   | 9.4               | -                | 16.6                           |                              |

<sup>a</sup> For the catalyst designation, see Methods (subsection 3.1); <sup>b</sup> Metal dispersion data (from H<sub>2</sub> chemisorption) located below catalyst designation; <sup>c</sup> GHSV 5760 h<sup>-1</sup>, catalyst weight 0.20 g.

**Table S2.** CHClF<sub>2</sub> hydrodechlorination on Pd-Pt/(acac)/Norit1600 catalysts precalcined at 350 °C for 1 h. TOFs, selectivities and apparent energies of activation.

| Catalyst <sup>a,b</sup>             | Reaction temperature<br>°C | TOF <sup>c</sup><br>s <sup>-1</sup> | Product selectivity, % |                   |                  |                                | Activation energy,<br>kJ/mol |
|-------------------------------------|----------------------------|-------------------------------------|------------------------|-------------------|------------------|--------------------------------|------------------------------|
|                                     |                            |                                     | CH <sub>4</sub>        | CH <sub>3</sub> F | CHF <sub>3</sub> | CH <sub>2</sub> F <sub>2</sub> |                              |
| Pd100(acac)<br>H/Pd = 0.161         | 272                        | 2.30 × 10 <sup>-3</sup>             | 29.5                   | -                 | -                | 70.5                           | 102.3 ± 1.5                  |
|                                     | 261                        | 1.46 × 10 <sup>-3</sup>             | 25.0                   | -                 | -                | 75.0                           |                              |
|                                     | 251                        | 9.25 × 10 <sup>-4</sup>             | 20.6                   | -                 | -                | 79.4                           |                              |
| Pd80Pt20(acac)<br>H/(Pd+Pt) = 0.223 | 272                        | 2.30 × 10 <sup>-3</sup>             | 38.0                   | 4.2               | -                | 57.8                           | 98.8 ± 2.8                   |
|                                     | 261                        | 1.50 × 10 <sup>-3</sup>             | 33.7                   | 4.0               | -                | 62.3                           |                              |
|                                     | 251                        | 9.6 × 10 <sup>-4</sup>              | 30.0                   | 4.0               | -                | 66.0                           |                              |
| Pd60Pt40(acac)<br>H/(Pd+Pt) = 0.243 | 272                        | 2.32 × 10 <sup>-3</sup>             | 43.6                   | 7.9               | -                | 48.5                           | 97.7 ± 4.8                   |
|                                     | 261                        | 1.61 × 10 <sup>-3</sup>             | 39.4                   | 8.5               | -                | 52.1                           |                              |
|                                     | 251                        | 1.02 × 10 <sup>-3</sup>             | 35.0                   | 8.5               | -                | 56.5                           |                              |
| Pd40Pt60(acac)<br>H/(Pd+Pt) = 0.321 | 272                        | 2.25 × 10 <sup>-3</sup>             | 47.2                   | 13.2              | -                | 39.6                           | 92.9 ± 1.3                   |
|                                     | 262                        | 1.55 × 10 <sup>-3</sup>             | 41.5                   | 14.9              | -                | 43.6                           |                              |
|                                     | 251                        | 9.9 × 10 <sup>-4</sup>              | 38.4                   | 15.6              | -                | 46.0                           |                              |
| Pt100(acac)<br>H/Pt = 0.348         | 272                        | 7.5 × 10 <sup>-4</sup>              | 52.8                   | 13.8              | 22.0             | 11.4                           | 107.5 ± 0.4                  |
|                                     | 262                        | 4.8 × 10 <sup>-4</sup>              | 60.2                   | 20.6              | -                | 19.2                           |                              |
|                                     | 251                        | 2.9 × 10 <sup>-4</sup>              | 66.3                   | 18.7              | -                | 15.0                           |                              |

<sup>a</sup> For the catalyst designation, see Methods (subsection 3.1); <sup>b</sup> Metal dispersion data (from H<sub>2</sub> chemisorption) located below catalyst designation; <sup>c</sup> GHSV 5760 h<sup>-1</sup>, catalyst weight 0.20 g.

**Table S3.** CHClF<sub>2</sub> hydrodechlorination on Pd-Pt/(acac)/Nortit1600 catalysts precalcined at 400 °C for 15 min. TOFs, selectivities and apparent energies of activation.

| Catalyst <sup>a,b</sup>                   | Reaction temperature<br>°C | TOF <sup>c</sup><br>s <sup>-1</sup> | Product selectivity <sup>c</sup> , % |                   |                  |                                | Activation energy,<br>kJ/mol |
|-------------------------------------------|----------------------------|-------------------------------------|--------------------------------------|-------------------|------------------|--------------------------------|------------------------------|
|                                           |                            |                                     | CH <sub>4</sub>                      | CH <sub>3</sub> F | CHF <sub>3</sub> | CH <sub>2</sub> F <sub>2</sub> |                              |
| Pd100(acac)<br>H/Pd = 0.105               | 272                        | 2.63 × 10 <sup>-3</sup>             | 33.7                                 | -                 | -                | 66.3                           | 98.5 ± 3.7                   |
|                                           | 262                        | 1.80 × 10 <sup>-3</sup>             | 30.1                                 | -                 | -                | 69.9                           |                              |
|                                           | 252                        | 1.15 × 10 <sup>-3</sup>             | 24.4                                 | -                 | -                | 75.6                           |                              |
| Pd80Pt20(acac)<br>H/(Pd+Pt) = 0.198       | 272                        | 2.50 × 10 <sup>-3</sup>             | 37.5                                 | 4.0               | -                | 58.5                           | 92.6 ± 8.3                   |
|                                           | 262                        | 1.60 × 10 <sup>-3</sup>             | 33.2                                 | 4.0               | -                | 62.8                           |                              |
|                                           | 251                        | 1.1 × 10 <sup>-4</sup>              | 28.9                                 | 3.9               | -                | 67.2                           |                              |
| Pd60Pt40(acac)<br>H/(Pd+Pt) = 0.212 0.229 | 272                        | 2.52 × 10 <sup>-3</sup>             | 42.6                                 | 7.8               | -                | 49.5                           | 94.4 ± 6.4                   |
|                                           | 261                        | 1.72 × 10 <sup>-3</sup>             | 38.4                                 | 8.4               | -                | 53.2                           |                              |
|                                           | 251                        | 1.09 × 10 <sup>-3</sup>             | 34.0                                 | 8.5               | -                | 57.5                           |                              |
| Pd40Pt60(acac)<br>H/(Pd+Pt) = 0.317       | 272                        | 2.10 × 10 <sup>-3</sup>             | 44.2                                 | 14.0              | -                | 41.8                           | 88.3 ± 2.8                   |
|                                           | 262                        | 1.43 × 10 <sup>-3</sup>             | 40.5                                 | 14.9              | -                | 44.6                           |                              |
|                                           | 252                        | 1.0 × 10 <sup>-4</sup>              | 36.4                                 | 15.7              | -                | 47.9                           |                              |
| Pt100(acac)<br>H/Pt = 0.273               | 271                        | 9.2 × 10 <sup>-4</sup>              | 53.1                                 | 13.8              | 21.5             | 11.5                           | 97.9 ± 12.8                  |
|                                           | 262                        | 5.8 × 10 <sup>-4</sup>              | 60.4                                 | 19.2              | -                | 20.4                           |                              |
|                                           | 251                        | 4.0 × 10 <sup>-4</sup>              | 70.2                                 | 19.3              | -                | 10.5                           |                              |

<sup>a</sup> For the catalyst designation, see Methods (subsection 3.1); <sup>b</sup> Metal dispersion data (from H<sub>2</sub> chemisorption) located below catalyst designation; <sup>c</sup> GHSV 5760 h<sup>-1</sup>, catalyst weight 0.20 g.

**Table S4.** CHClF<sub>2</sub> hydrodechlorination on Pd-Pt/Norit catalysts prepared from palladium and platinum chlorides. TOFs, selectivities and apparent energies of activation.

| Catalyst <sup>a,b</sup>                                                                     | Reaction temperature<br>°C | TOF <sup>c</sup><br>s <sup>-1</sup> | Product selectivity <sup>c</sup> , % |                   |                  |                                | Activation energy,<br>kJ/mol |
|---------------------------------------------------------------------------------------------|----------------------------|-------------------------------------|--------------------------------------|-------------------|------------------|--------------------------------|------------------------------|
|                                                                                             |                            |                                     | CH <sub>4</sub>                      | CH <sub>3</sub> F | CHF <sub>3</sub> | CH <sub>2</sub> F <sub>2</sub> |                              |
| Supported on Norit1600, after calcination at 400 °C (0.25 h), and reduction at 400 °C (3 h) |                            |                                     |                                      |                   |                  |                                |                              |
| Pd100(Cl)<br>H/Pd = 0.266                                                                   | 271                        | 2.80 × 10 <sup>-3</sup>             | 36.8                                 | 1.2               | -                | 62.0                           | 95.9 ± 1.3                   |
|                                                                                             | 261                        | 1.90 × 10 <sup>-3</sup>             | 33.6                                 | 1.2               | -                | 65.2                           |                              |
|                                                                                             | 252                        | 1.30 × 10 <sup>-3</sup>             | 30.1                                 | -                 | -                | 69.9                           |                              |
| Pd60Pt40(Cl)<br>H/(Pd+Pt) =<br>0.277 0.287                                                  | 271                        | 2.80 × 10 <sup>-3</sup>             | 53.4                                 | 5.6               | -                | 41.0                           | 91.1 ± 1.4                   |
|                                                                                             | 261                        | 1.90 × 10 <sup>-3</sup>             | 50.9                                 | 5.9               | -                | 43.2                           |                              |
|                                                                                             | 252                        | 1.35 × 10 <sup>-3</sup>             | 47.4                                 | 6.3               | -                | 46.2                           |                              |
| Pt100(Cl)<br>H/Pt = 0.62                                                                    | 271                        | 1.0 × 10 <sup>-3</sup>              | 70.9                                 | 12.9              | 0.3              | 15.8                           | 97.0 ± 4.4                   |
|                                                                                             | 261                        | 6.9 × 10 <sup>-4</sup>              | 68.7                                 | 12.7              | -                | 18.5                           |                              |
|                                                                                             | 252                        | 4.6 × 10 <sup>-4</sup>              | 66.9                                 | 13.5              | -                | 19.6                           |                              |
| Supported on Norit1800, after reduction at 400 °C for 3 h                                   |                            |                                     |                                      |                   |                  |                                |                              |
| 3 wt.% Pd<br>H/Pd = 0.215                                                                   | 272                        | 2.90 × 10 <sup>-3</sup>             | 34.8                                 | -                 | -                | 65.2                           | 86.4 ± 9.1                   |
|                                                                                             | 261                        | 2.10 × 10 <sup>-3</sup>             | 31.0                                 | -                 | -                | 69.0                           |                              |
|                                                                                             | 251                        | 1.35 × 10 <sup>-3</sup>             | 25.7                                 | -                 | -                | 74.3                           |                              |

<sup>a</sup> For the catalyst designation, see Methods (subsection 3.1); <sup>b</sup> Metal dispersion data (from H<sub>2</sub> chemisorption) located below catalyst designation; <sup>c</sup> GHSV 5760 h<sup>-1</sup>, catalyst weight 0.20 g.

#### SET S1. Characteristics of 3 wt.% Pd/Norit1800 catalyst.

Taken from M. Bonarowska, B. Burda, W. Juszczak J. Pielaszek, Z. Kowalczyk, Z. Karpiński, Appl. Catal. B 35 (2001) 13-20.

Support: Norit RO 08 activated by helium pretreatment at 1800 °C.

Preparation: ex-PdCl<sub>2,aq</sub> acidified with HCl, incipient wetness

Metal dispersion after reduction at 400 °C: H/Pd = 0.20; CO/Pd = 0.21 (previous data); H/Pd = 0.215 (recent measurement).

Pd crystallite size (from XRD line broadening): ~3 nm.

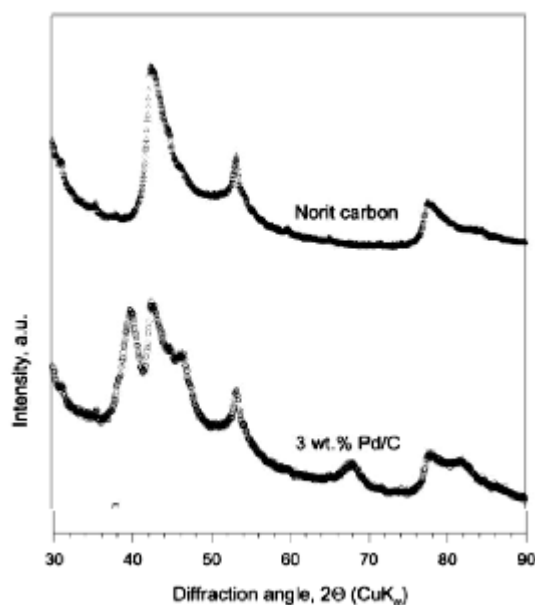

Figure S1: XRD profiles from Norit1800 and 3 wt.% Pd/Norit1800 catalysts.

adapted from Bonarowska et al., cited above.

#### Characteristics based on determination of N<sub>2</sub> adsorption isotherm.

BET surface area 85.2 m<sup>2</sup>/g  
 $T_{\text{plot}}$  micropore volume = 0.0010 cm<sup>3</sup>/g  
 BJH pore volume (adsorption) 0.2082 cm<sup>3</sup>/g  
 BJH pore volume (desorption) 0.2065 cm<sup>3</sup>/g.

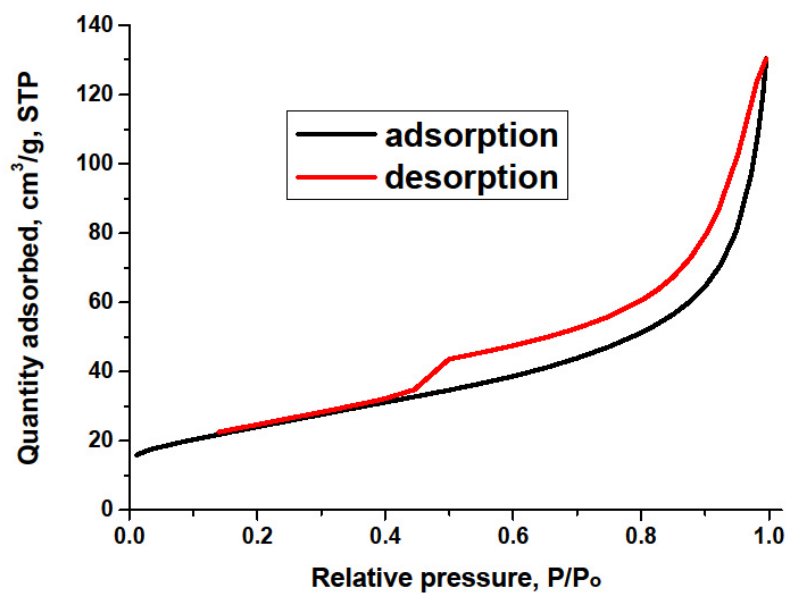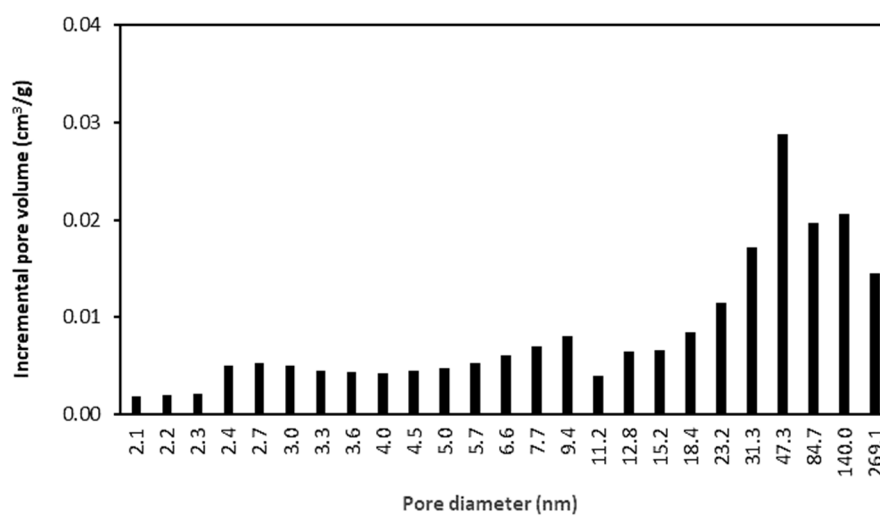

Figure S2: N<sub>2</sub> adsorption-desorption isotherms of N<sub>2</sub> on Norit1800 carbon (top) and pore size distribution in Norit1800 activated carbon (bottom).
